# Supplementary material for: A genome-wide imaging-based screening to identify genes involved in synphilin-1 inclusion formation in Saccharomyces cerevisiae
Source: PubMed Central journal article supplement (PMC4954962; doi:10.1038/srep30134), 2016-07-21
Supplement: srep30134-s1.pdf [file srep30134-s1.pdf]

# A genome-wide imaging-based screening to identify genes involved in synphilin-1 inclusion formation in *Saccharomyces cerevisiae*

Lei Zhao<sup>1</sup>, Qian Yang<sup>1</sup>, Ju Zheng<sup>2</sup>, Xuefeng Zhu<sup>3</sup>, Xinxin Hao<sup>4</sup>, Jia Song<sup>1</sup>, Tom Lebacqz<sup>2</sup>, Vanessa Franssens<sup>2</sup>, Joris Winderickx<sup>2\*</sup>, Thomas Nystrom<sup>4\*</sup>, Beidong Liu<sup>1,4\*</sup>

<sup>1</sup> School of Life Science and Technology, Harbin Institute of Technology, Harbin 150001, China

<sup>2</sup> Department of Biology, Functional Biology, KU Leuven, 3001 Heverlee, Belgium

<sup>3</sup> Department of Medical Biochemistry and Cell Biology, University of Gothenburg, S-405 30, Göteborg, Sweden

<sup>4</sup> Department of Chemistry and Molecular Biology, University of Gothenburg, S-413 90, Göteborg, Sweden

\*Correspondence: [beidong.liu@cmb.gu.se](mailto:beidong.liu@cmb.gu.se),

[thomas.nystrom@cmb.gu.se](mailto:thomas.nystrom@cmb.gu.se),

[Joris.Winderickx@bio.kuleuven.be](mailto:Joris.Winderickx@bio.kuleuven.be)

## Table of Contents

**Supplementary Tables S1:** Strains used in this study

**Supplementary Tables S2:** Plasmids used in this study

**Supplementary Tables S3:** Mutants with manually confirmed decreased synphilin-1 inclusions phenotype

**Supplementary Tables S4:** Functional enrichment analysis of confirmed hits with decrease of cells with synphilin-1 inclusion

**Supplementary Tables S5:** Human homologues of functional enriched yeast genes

**Supplementary Tables S6:** Mutants with manually confirmed increased synphilin-1 inclusions phenotype

**Supplementary Tables S7:** Functional enrichment analysis of confirmed hits with increase of cells with synphilin-1 inclusion

**Supplementary Tables S8:** Mutants showed significant decrease in both the percentage of cells with synphilin-1 inclusion and the fluorescence intensity

**Supplementary Figure S1:** Manual confirmation status of hits from HCI screening

## SUPPLEMENTARY TABLES

**Supplementary Table S1: Strains used in this study**

| Strain Name    | Genotype and markers                                                                                         | Background/Source                                                   |
|----------------|--------------------------------------------------------------------------------------------------------------|---------------------------------------------------------------------|
| BY4741 (WT)    | <i>MATa his3Δ1 leu2Δ0 ura3Δ0 met15Δ0</i>                                                                     | EUROSCARF; Wt control for strains constructed by PCR approach       |
| Y7092-pSY285   | <i>MATa can1Δ::STE2pr-Sp_his5 lyp1Δ ura3Δ0 leu2Δ0 his3Δ1 met15Δ0 LYS2+</i><br>pYX212-dsRed-SY1 (URA+)        | This study, query strain                                            |
| Y7092-pSY244   | <i>MATa can1Δ::STE2pr-Sp_his5 lyp1Δ ura3Δ0 leu2Δ0 his3Δ1 met15Δ0 LYS2+</i><br>pYX212-dsRed (URA+)            | This study, query strain, Control for strain expressing synphilin-1 |
| BY4741-pSY285  | BY4741 with pYX212-dsRed-SY1 (URA+)                                                                          | This study                                                          |
| BY4741-pSY244  | BY4741 with pYX212-dsRed (URA+)                                                                              | This study, Control for strain expressing synphilin-1               |
| BY4741-pSY285' | BY4741 with pYX212-dsRed-SY1 (Hyg+)                                                                          | This study                                                          |
| BY4741-pSY244' | BY4741 with pYX212-dsRed (Hyg+)                                                                              | This study, Control for strain expressing synphilin-1               |
| his3Δ-244      | <i>MATa his3Δ::kanMX4 can1Δ::STE2pr-Sp_his5 lyp1Δ ura3Δ0 leu2Δ0 met15Δ0 LYS2+</i> pYX212-dsRed (URA+)        | This study; Wt control for strains expressing synphilin-1           |
| his3Δ-285      | <i>MATa his3Δ::kanMX4 can1Δ::STE2pr-Sp_his5 lyp1Δ ura3Δ0 leu2Δ0 met15Δ0 LYS2+</i><br>pYX212-dsRed-SY1 (URA+) | This study; Wt control for strains constructed by crossing          |
| dyn3Δ-285      | <i>MATa dyn3Δ::kanMX4 can1Δ::STE2pr-Sp_his5 lyp1Δ ura3Δ0 leu2Δ0 met15Δ0 LYS2+</i><br>pYX212-dsRed-SY1 (URA+) | This study                                                          |
| gim4Δ-285      | <i>MATa gim4Δ::kanMX4 can1Δ::STE2pr-Sp_his5 lyp1Δ ura3Δ0 leu2Δ0 met15Δ0 LYS2+</i><br>pYX212-dsRed-SY1 (URA+) | This study                                                          |
| yke2Δ-285      | <i>MATa yke2Δ::kanMX4 can1Δ::STE2pr-Sp_his5 lyp1Δ ura3Δ0 leu2Δ0 met15Δ0 LYS2+</i><br>pYX212-dsRed-SY1 (URA+) | This study                                                          |
| kar3Δ-285      | <i>MATa kar3Δ::kanMX4 can1Δ::STE2pr-Sp_his5 lyp1Δ ura3Δ0 leu2Δ0 met15Δ0 LYS2+</i>                            | This study                                                          |

pYX212-dsRed-SY1 (URA+)

|            |                                                                                                                                   |            |
|------------|-----------------------------------------------------------------------------------------------------------------------------------|------------|
| she4Δ-285  | <i>MATa she4Δ::kanMX4</i><br><i>can1Δ::STE2pr-Sp_his5 lyp1Δ ura3Δ0</i><br><i>leu2Δ0 met15Δ0 LYS2+</i><br>pYX212-dsRed-SY1 (URA+)  | This study |
| vac14Δ-285 | <i>MATa vac14Δ::kanMX4</i><br><i>can1Δ::STE2pr-Sp_his5 lyp1Δ ura3Δ0</i><br><i>leu2Δ0 met15Δ0 LYS2+</i><br>pYX212-dsRed-SY1 (URA+) | This study |
| idh1Δ-285  | <i>MATa idh1Δ::kanMX4</i><br><i>can1Δ::STE2pr-Sp_his5 lyp1Δ ura3Δ0</i><br><i>leu2Δ0 met15Δ0 LYS2+</i><br>pYX212-dsRed-SY1 (URA+)  | This study |
| cbc2Δ-285  | <i>MATa cbc2Δ::kanMX4</i><br><i>can1Δ::STE2pr-Sp_his5 lyp1Δ ura3Δ0</i><br><i>leu2Δ0 met15Δ0 LYS2+</i><br>pYX212-dsRed-SY1 (URA+)  | This study |
| ctf18Δ-285 | <i>MATa ctf18Δ::kanMX4</i><br><i>can1Δ::STE2pr-Sp_his5 lyp1Δ ura3Δ0</i><br><i>leu2Δ0 met15Δ0 LYS2+</i><br>pYX212-dsRed-SY1 (URA+) | This study |
| srb2Δ-285  | <i>MATa srb2Δ::kanMX4</i><br><i>can1Δ::STE2pr-Sp_his5 lyp1Δ ura3Δ0</i><br><i>leu2Δ0 met15Δ0 LYS2+</i><br>pYX212-dsRed-SY1 (URA+)  | This study |
| idh2Δ-285  | <i>MATa idh2Δ::kanMX4</i><br><i>can1Δ::STE2pr-Sp_his5 lyp1Δ ura3Δ0</i><br><i>leu2Δ0 met15Δ0 LYS2+</i><br>pYX212-dsRed-SY1 (URA+)  | This study |
| rtg3-285   | <i>MATa rtg3Δ::kanMX4</i><br><i>can1Δ::STE2pr-Sp_his5 lyp1Δ ura3Δ0</i><br><i>leu2Δ0 met15Δ0 LYS2+</i><br>pYX212-dsRed-SY1 (URA+)  | This study |
| irc14-285  | <i>MATa irc14Δ::kanMX4</i><br><i>can1Δ::STE2pr-Sp_his5 lyp1Δ ura3Δ0</i><br><i>leu2Δ0 met15Δ0 LYS2+</i><br>pYX212-dsRed-SY1 (URA+) | This study |
| tid3-1-285 | <i>MATa tid3-1::kanMX4</i><br><i>can1Δ::STE2pr-Sp_his5 lyp1Δ ura3Δ0</i><br><i>leu2Δ0 met15Δ0 LYS2+</i><br>pYX212-dsRed-SY1 (URA+) | This study |

|            | <i>MATa cdc3-1::kanMX4</i>                                                                          |                              |
|------------|-----------------------------------------------------------------------------------------------------|------------------------------|
| cdc3-1-285 | <i>can1Δ::STE2pr-Sp_his5 lyp1Δ ura3Δ0</i><br><i>leu2Δ0 met15Δ0 LYS2+</i><br>pYX212-dsRed-SY1 (URA+) | This study                   |
| his3Δ      | BY4741 with <i>his3Δ::KanMX4</i>                                                                    | SGA-V2 collection, Boone lab |
| dyn3Δ      | BY4741 with <i>dyn3Δ::KanMX4</i>                                                                    | SGA-V2 collection, Boone lab |
| gim4Δ      | BY4741 with <i>gim4Δ::KanMX4</i>                                                                    | SGA-V2 collection, Boone lab |
| yke2Δ      | BY4741 with <i>yke2Δ::KanMX4</i>                                                                    | SGA-V2 collection, Boone lab |
| kar3Δ      | BY4741 with <i>kar3Δ::KanMX4</i>                                                                    | SGA-V2 collection, Boone lab |
| she4Δ      | BY4741 with <i>she4Δ::KanMX4</i>                                                                    | SGA-V2 collection, Boone lab |
| vac14Δ     | BY4741 with <i>vac14Δ::KanMX4</i>                                                                   | SGA-V2 collection, Boone lab |
| dyn3Δ-SM   | BY4741 with <i>dyn3Δ::KanMX4</i><br>+pYX212-dsRed-SY1 (Hyg+)<br>+MoBY-DYN3(URA+)                    | This study                   |
| gim4Δ-SM   | BY4741 with <i>gim4Δ::KanMX4</i><br>+pYX212-dsRed-SY1 (Hyg+)<br>+MoBY-GIM4(URA+)                    | This study                   |
| yke2Δ-SM   | BY4741 with <i>yke2Δ::KanMX4</i><br>+pYX212-dsRed-SY1 (Hyg+)<br>+MoBY-YKE2(URA+)                    | This study                   |
| kar3Δ-SM   | BY4741 with <i>kar3Δ::KanMX4</i><br>+pYX212-dsRed-SY1 (Hyg+)<br>+MoBY-KAR3(URA+)                    | This study                   |
| she4Δ-SM   | BY4741 with <i>she4Δ::KanMX4</i><br>+pYX212-dsRed-SY1 (Hyg+)<br>+MoBY-SHE4(URA+)                    | This study                   |
| vac14Δ-SM  | BY4741 with <i>vac14Δ::KanMX4</i><br>+pYX212-dsRed-SY1 (Hyg+)<br>+MoBY-VAC14(URA+)                  | This study                   |
| his3Δ-SP   | BY4741 with <i>his3Δ::KanMX4</i><br>+pYX212-dsRed-SY1<br>(Hyg+)+p5586(URA+)                         | This study                   |
| dyn3Δ-SP   | BY4741 with <i>dyn3Δ::KanMX4</i><br>+pYX212-dsRed-SY1<br>(Hyg+)+p5586(URA+)                         | This study                   |
| gim4Δ-SP   | BY4741 with <i>gim4Δ::KanMX4</i><br>+pYX212-dsRed-SY1<br>(Hyg+)+p5586(URA+)                         | This study                   |
| yke2Δ-SP   | BY4741 with <i>yke2Δ::KanMX4</i><br>+pYX212-dsRed-SY1<br>(Hyg+)+p5586(URA+)                         | This study                   |
| kar3Δ-SP   | BY4741 with <i>kar3Δ::KanMX4</i><br>+pYX212-dsRed-SY1<br>(Hyg+)+p5586(URA+)                         | This study                   |

|                         |                                                                              |            |
|-------------------------|------------------------------------------------------------------------------|------------|
| she4Δ-SP                | BY4741 with <i>she4Δ::KanMX4</i><br>+pYX212-dsRed-SY1<br>(Hyg+)+p5586(URA+)  | This study |
| vac14Δ-SP               | BY4741 with <i>vac14Δ::KanMX4</i><br>+pYX212-dsRed-SY1<br>(Hyg+)+p5586(URA+) | This study |
| SGA-V2<br>collection    | BY4741 with <i>xxxΔ::KanMX4</i> collection                                   | Boone lab  |
| Ts-V5 collection        | BY4741 background, essential gene<br>temperature sensitive allele collection | Boone lab  |
| S2YDSY1<br>collection   | SGA-V2 with pYX212-dsRed-synphilin-1                                         | This study |
| S2YD collection         | SGA-V2 with pYX212-dsRed (control for<br>S2YDSY1 collection)                 | This study |
| Sts5YDSY1<br>collection | Ts-V5 with pYX212-dsRed-synphilin-1                                          | This study |
| Sts5YD collection       | Ts-V5 with pYX212-dsRed (control for<br>Sts5YDSY1 collection )               | This study |

### Supplementary Table S2: Plasmids used in this study

| Plasmid Name | Genotype and markers                                                                      | Background/Source   |
|--------------|-------------------------------------------------------------------------------------------|---------------------|
| pYX285       | pYX212-SY1-dsRed, (URA3+, AmpR)                                                           | BÜTTNER et al. 2010 |
| pYX244       | pYX212-dsRed, (URA3+, AmpR)                                                               | BÜTTNER et al. 2010 |
| pYX285'      | pYX212-SY1-dsRed, (Hygromycin B+,<br>AmpR)                                                | This study          |
| pYX244'      | pYX212-dsRed, (Hygromycin B+, AmpR)                                                       | This study          |
| p5586        | p5472+URA3+CEN+MAGIC (URA3+,<br>tetracycline+, kanamycin+,<br>chloramphenicol+ )          | MoBY-ORF library    |
| pMoBY-DYN3   | p5586-DYN3 ORF (URA3+, Hygromycin<br>B+, tetracycline+, kanamycin+,<br>chloramphenicol+ ) | MoBY-ORF library    |
| pMoBY-GIM4   | p5586-GIM4 ORF (URA3+, Hygromycin<br>B+, tetracycline+, kanamycin+,<br>chloramphenicol+ ) | MoBY-ORF library    |
| pMoBY-YKE2   | p5586-YKE2 ORF (URA3+, Hygromycin<br>B+, tetracycline+, kanamycin+,<br>chloramphenicol+ ) | MoBY-ORF library    |
| pMoBY-KAR3   | p5586-KAR3 ORF(URA3+, Hygromycin<br>B+, tetracycline+, kanamycin+,<br>chloramphenicol+ )  | MoBY-ORF library    |

|             |                                                                                             |                    |
|-------------|---------------------------------------------------------------------------------------------|--------------------|
| pMoBY-SHE4  | p5586- <i>SHE4</i> ORF (URA3+, Hygromycin B+, tetracycline+, kanamycin+, chloramphenicol+ ) | MoBY-ORF library   |
| pMoBY-VAC14 | p5586- <i>VAC14</i> ORF (URA3+, tetracycline+, kanamycin+, chloramphenicol+ )               | MoBY-ORF library   |
| pSG32       | (Hygromycin B+)                                                                             | For hphMX4 amplify |

**Supplementary Table S3: Mutants with manually confirmed decreased synphilin-1 inclusions phenotype**

| Number | Mutant             | Normalized percentage of cells with SY1 inclusions (%) | Relative intensity | Intensity <i>t</i> -test (P value) |
|--------|--------------------|--------------------------------------------------------|--------------------|------------------------------------|
| 0      | wt                 | 50.00                                                  | 100.00             |                                    |
| 1      | <i>cbc2Δ</i>       | 0.20                                                   | 22.71              | 0.0702                             |
| 2      | <i>ctf18Δ</i>      | 1.37                                                   | 61.44              | 0.2371                             |
| 3      | <i>tid3-1</i>      | 1.70                                                   | 67.78              | 0.1161                             |
| 4      | <i>idh2Δ</i>       | 1.70                                                   | 74.41              | 0.3265                             |
| 5      | <i>cdc3-1</i>      | 2.66                                                   | 68.16              | 0.0531                             |
| 6      | <i>srb2Δ</i>       | 2.76                                                   | 103.01             | 0.5860                             |
| 7      | <i>rtg3Δ</i>       | 2.91                                                   | 42.39              | 0.0855                             |
| 8      | <i>irc14Δ</i>      | 3.24                                                   | 62.78              | 0.0980                             |
| 9      | <i>idh1Δ</i>       | 3.41                                                   | 68.76              | 0.0832                             |
| 10     | <i>cdc5-1</i>      | 4.22                                                   | 70.19              | 0.0616                             |
| 11     | <i>cdc73Δ</i>      | 4.23                                                   | 70.79              | 0.1479                             |
| 12     | <i>bre1Δ</i>       | 4.41                                                   | 70.47              | 0.1634                             |
| 13     | <i>rad14Δ</i>      | 4.83                                                   | 123.66             | 0.0013                             |
| 14     | <i>bap2Δ</i>       | 5.84                                                   | 61.73              | 0.2459                             |
| 15     | <i>psf1-1</i>      | 5.90                                                   | 98.45              | 0.6070                             |
| 16     | <i>abd1-5</i>      | 6.11                                                   | 59.33              | 0.0731                             |
| 17     | <i>gpi19-2</i>     | 6.18                                                   | 82.48              | 0.2261                             |
| 18     | <i>act1-112</i>    | 6.23                                                   | 62.15              | 0.1426                             |
| 19     | <i>cdc20-1</i>     | 6.38                                                   | 58.30              | 0.1508                             |
| 20     | <i>jnm1Δ</i>       | 6.67                                                   | 71.07              | 0.0656                             |
| 21     | <i>rfc2-1</i>      | 6.77                                                   | 89.79              | 0.3747                             |
| 22     | <i>kar3Δ</i>       | 6.99                                                   | 47.55              | 0.1204                             |
| 23     | <i>soh1Δ</i>       | 7.05                                                   | 99.93              | 0.9894                             |
| 24     | <i>pac10Δ</i>      | 7.27                                                   | 88.78              | 0.6408                             |
| 25     | <i>rpn12-1</i>     | 7.29                                                   | 93.00              | 0.1913                             |
| 26     | <i>spt14-1-10c</i> | 7.35                                                   | 92.17              | 0.2130                             |
| 27     | <i>orc2-2</i>      | 7.45                                                   | 97.09              | 0.6545                             |
| 28     | <i>cdc53-1</i>     | 7.67                                                   | 60.00              | 0.0983                             |

|    |                 |       |        |        |
|----|-----------------|-------|--------|--------|
| 29 | <i>act1-133</i> | 7.87  | 62.94  | 0.0613 |
| 30 | <i>rpn10Δ</i>   | 8.12  | 82.93  | 0.3363 |
| 31 | <i>hur1Δ</i>    | 8.28  | 96.68  | 0.8663 |
| 32 | <i>pmr1Δ</i>    | 8.38  | 80.18  | 0.2948 |
| 33 | <i>ctf4Δ</i>    | 8.51  | 47.63  | 0.1020 |
| 34 | <i>act1-105</i> | 8.73  | 64.67  | 0.1957 |
| 35 | <i>poll-13</i>  | 8.93  | 88.12  | 0.3093 |
| 36 | <i>spe3Δ</i>    | 8.99  | 86.02  | 0.1787 |
| 37 | <i>smc1-2</i>   | 9.23  | 77.97  | 0.0543 |
| 38 | <i>spt8Δ</i>    | 9.30  | 67.17  | 0.2603 |
| 39 | <i>act1-3</i>   | 9.65  | 86.73  | 0.0884 |
| 40 | <i>mcm3-1</i>   | 10.07 | 74.84  | 0.2017 |
| 41 | <i>mms22Δ</i>   | 10.15 | 60.34  | 0.3571 |
| 42 | <i>ira2Δ</i>    | 10.45 | 63.52  | 0.1043 |
| 43 | <i>apc11-22</i> | 10.47 | 72.38  | 0.1282 |
| 44 | <i>gpr1Δ</i>    | 10.48 | 92.81  | 0.5443 |
| 45 | <i>pds5-1</i>   | 10.92 | 58.63  | 0.1094 |
| 46 | <i>isc1Δ</i>    | 10.99 | 93.85  | 0.9580 |
| 47 | <i>rvs161Δ</i>  | 11.27 | 102.33 | 0.7764 |
| 48 | <i>stu1-6</i>   | 11.38 | 90.15  | 0.2789 |
| 49 | <i>est1Δ</i>    | 11.60 | 83.33  | 0.4955 |
| 50 | <i>rfa1-m2</i>  | 11.92 | 90.36  | 0.1263 |
| 51 | <i>rpo21-1</i>  | 11.99 | 62.24  | 0.0547 |
| 52 | <i>stu2-10</i>  | 12.64 | 108.87 | 0.7958 |
| 53 | <i>mms1Δ</i>    | 12.78 | 65.37  | 0.3096 |
| 54 | <i>rcy1Δ</i>    | 13.11 | 64.18  | 0.1897 |
| 55 | <i>act1-125</i> | 13.28 | 66.49  | 0.1024 |
| 56 | <i>ctf8Δ</i>    | 13.85 | 61.49  | 0.0987 |
| 57 | <i>she4Δ</i>    | 14.42 | 65.36  | 0.2147 |
| 58 | <i>asf1Δ</i>    | 14.42 | 78.89  | 0.2732 |
| 59 | <i>cdc20-3</i>  | 14.42 | 60.24  | 0.0866 |
| 60 | <i>act1-129</i> | 14.55 | 94.62  | 0.1015 |
| 61 | <i>pib2Δ</i>    | 14.59 | 108.39 | 0.7504 |
| 62 | <i>aro2Δ</i>    | 14.67 | 81.65  | 0.3638 |
| 63 | <i>lat1Δ</i>    | 14.96 | 73.78  | 0.0602 |
| 64 | <i>leo1Δ</i>    | 15.18 | 98.54  | 0.1710 |
| 65 | <i>arg2Δ</i>    | 15.37 | 92.61  | 0.3546 |
| 66 | <i>rad52Δ</i>   | 15.59 | 73.62  | 0.2094 |
| 67 | <i>csg2Δ</i>    | 15.81 | 92.07  | 0.7368 |
| 68 | <i>lge1Δ</i>    | 15.85 | 76.55  | 0.4217 |
| 69 | <i>aah1Δ</i>    | 16.17 | 76.85  | 0.3225 |
| 70 | <i>rpe1Δ</i>    | 16.17 | 91.34  | 0.9704 |
| 71 | <i>rad27Δ</i>   | 16.20 | 91.37  | 0.0791 |
| 72 | <i>rtf1Δ</i>    | 16.37 | 75.43  | 0.0947 |

|     |                  |       |        |        |
|-----|------------------|-------|--------|--------|
| 73  | <i>cdc15-2</i>   | 16.61 | 86.59  | 0.1059 |
| 74  | <i>clb5Δ</i>     | 16.71 | 81.56  | 0.9800 |
| 75  | <i>pcf11-ts2</i> | 16.81 | 75.80  | 0.1105 |
| 76  | <i>pde2Δ</i>     | 16.91 | 91.56  | 0.3362 |
| 77  | <i>nip100Δ</i>   | 17.01 | 67.94  | 0.5268 |
| 78  | <i>dia2Δ</i>     | 17.34 | 150.63 | 0.0421 |
| 79  | <i>sec66Δ</i>    | 17.44 | 89.21  | 0.1357 |
| 80  | <i>yta7Δ</i>     | 17.54 | 97.63  | 0.6665 |
| 81  | <i>sub1Δ</i>     | 17.64 | 79.22  | 0.6241 |
| 82  | <i>yke2Δ</i>     | 17.85 | 89.72  | 0.6966 |
| 83  | <i>gwt1-20</i>   | 17.97 | 107.70 | 0.9268 |
| 84  | <i>dyn3Δ</i>     | 18.03 | 81.67  | 0.3326 |
| 85  | <i>arv1Δ</i>     | 18.52 | 95.78  | 0.8862 |
| 86  | <i>sla1Δ</i>     | 19.45 | 73.56  | 0.5605 |
| 87  | <i>spflΔ</i>     | 19.51 | 82.87  | 0.0528 |
| 88  | <i>swd1Δ</i>     | 19.52 | 66.96  | 0.7769 |
| 89  | <i>bts1Δ</i>     | 19.59 | 80.62  | 0.8082 |
| 90  | <i>ubp15Δ</i>    | 19.85 | 64.47  | 0.0589 |
| 91  | <i>dyn1Δ</i>     | 19.98 | 79.14  | 0.5109 |
| 92  | <i>kem1Δ</i>     | 20.12 | 59.61  | 0.1279 |
| 93  | <i>num1Δ</i>     | 20.14 | 81.76  | 0.0780 |
| 94  | <i>swi6Δ</i>     | 20.27 | 62.52  | 0.0688 |
| 95  | <i>chl1Δ</i>     | 20.96 | 78.81  | 0.4542 |
| 96  | <i>gtr2Δ</i>     | 21.10 | 89.08  | 0.2366 |
| 97  | <i>dep1Δ</i>     | 21.28 | 75.51  | 0.3573 |
| 98  | <i>hex3Δ</i>     | 22.09 | 92.89  | 0.7206 |
| 99  | <i>rtt109Δ</i>   | 22.17 | 103.60 | 0.1670 |
| 100 | <i>ssk1Δ</i>     | 22.52 | 64.47  | 0.2329 |
| 101 | <i>lrp1Δ</i>     | 22.63 | 107.11 | 0.2375 |
| 102 | <i>ldb18Δ</i>    | 22.73 | 75.88  | 0.3947 |
| 103 | <i>ade1Δ</i>     | 22.86 | 73.75  | 0.5854 |
| 104 | <i>vac14Δ</i>    | 23.42 | 96.55  | 0.6339 |
| 105 | <i>pac1Δ</i>     | 23.55 | 76.11  | 0.1951 |
| 106 | <i>pdb1Δ</i>     | 23.98 | 60.15  | 0.1658 |
| 107 | <i>ost4Δ</i>     | 24.17 | 93.49  | 0.3114 |
| 108 | <i>swd3Δ</i>     | 24.30 | 79.39  | 0.7011 |
| 109 | <i>spe2Δ</i>     | 24.32 | 80.62  | 0.5859 |
| 110 | <i>gim4Δ</i>     | 24.53 | 88.24  | 0.2892 |
| 111 | <i>thr4Δ</i>     | 24.54 | 73.25  | 0.1908 |
| 112 | <i>las21Δ</i>    | 24.72 | 93.23  | 0.3713 |
| 113 | <i>sac1Δ</i>     | 26.76 | 79.32  | 0.2403 |
| 114 | <i>ded1-199</i>  | 27.03 | 67.87  | 0.0536 |
| 115 | <i>stt3-7</i>    | 27.23 | 102.65 | 0.8626 |
| 116 | <i>tps1Δ</i>     | 27.25 | 57.46  | 0.1786 |



|     |                |       |       |        |
|-----|----------------|-------|-------|--------|
| 117 | <i>ecm8Δ</i>   | 27.64 | 81.81 | 0.8692 |
| 118 | <i>hoc1Δ</i>   | 27.84 | 77.74 | 0.4873 |
| 119 | <i>pac11Δ</i>  | 28.55 | 87.05 | 0.1662 |
| 120 | <i>mct1Δ</i>   | 28.70 | 74.61 | 0.1654 |
| 121 | <i>nkp2Δ</i>   | 29.14 | 78.15 | 0.7418 |
| 122 | <i>ecm33Δ</i>  | 30.06 | 75.96 | 0.9666 |
| 123 | <i>nup133Δ</i> | 30.21 | 88.16 | 0.7494 |
| 124 | <i>gyp1Δ</i>   | 30.47 | 74.13 | 0.1783 |
| 125 | <i>sic1Δ</i>   | 30.48 | 88.67 | 0.8745 |
| 126 | <i>etr1Δ</i>   | 31.07 | 62.67 | 0.2541 |
| 127 | <i>ald6Δ</i>   | 32.28 | 83.63 | 0.9568 |
| 128 | <i>clb2Δ</i>   | 32.67 | 65.62 | 0.3195 |
| 129 | <i>hom6Δ</i>   | 33.72 | 86.16 | 0.1411 |
| 130 | <i>slm4Δ</i>   | 34.81 | 73.46 | 0.5164 |
| 131 | <i>lip5Δ</i>   | 34.87 | 65.44 | 0.1015 |
| 132 | <i>tip1Δ</i>   | 35.50 | 73.06 | 0.5078 |
| 133 | <i>syg1Δ</i>   | 36.67 | 59.63 | 0.0813 |

\*  $P \leq 0.05$  indicates significant signal intensity difference between wild-type and mutant

#### Supplementary Table S4: Functional enrichment analysis of confirmed hits with decrease of cells with synphilin-1 inclusion

| Terms                                                          | Gene(s) annotated to the term                                                                                                                   |
|----------------------------------------------------------------|-------------------------------------------------------------------------------------------------------------------------------------------------|
| Microtubule cytoskeleton organization                          | CDC15/STU1/NUM1/PAC11/ACT1/NDC80/DYN1/LDB18/S<br>TU2/CDC5/JNM1/NIP100/CLB2/CLB5/KAR3                                                            |
| DNA replication                                                | DEP1/RFA1/ORC2/BRE1/PSF1/MCM3/HUR1/RFC2/RAD27<br>/MMS22/CTF18/POL1/DIA2/LGE1/CLB5/CTF4/MMS1                                                     |
| Positive regulation of DNA-templated transcription, elongation | XRN1/RTF1/ASF1/YKE2/CDC73/SUB1/LEO1                                                                                                             |
| Histone modification                                           | DEP1/SWD1/ORC2/SWD3/BRE1/ACT1/RTF1/ASF1/RTT10<br>9/SPT8/CDC73/LEO1/LGE1                                                                         |
| Sister chromatid segregation                                   | SMC1/CDC20/SOH1/CTF8/RFC2/DYN1/MMS22/PDS5/CTF<br>18/CHL1/CLB2/CTF4/KAR3                                                                         |
| Glycolipid biosynthetic process                                | CSG2/GPI19/LAS21/GWT1/ARV1/SPT14                                                                                                                |
| DNA repair                                                     | RFA1/BRE1/RPO21/PSF1/MCM3/SMC1/ACT1/SOH1/RTF1/<br>RFC2/RAD27/NUP133/RTT109/MMS22/CDC73/RAD52/SU<br>B1/PDS5/CTF18/RAD14/POL1/LEO1/CHL1/CTF4/MMS1 |

**Supplementary Table S5: Human homologues of functional enriched yeast genes**

| Yeast Gene Name | Homologue Standard Name | Homologue Organism | Cross References Identifier | Homologue Diseases                                                                             | Source  |
|-----------------|-------------------------|--------------------|-----------------------------|------------------------------------------------------------------------------------------------|---------|
| ACT1            | ACTA1                   | H. sapiens         | 255310                      | MYOPATHY, CONGENITAL, WITH FIBER-TYPE DISPROPORTION; CFTD                                      | Ensembl |
| ACT1            | ACTA2                   | H. sapiens         | 614042                      | MOYAMOYA DISEASE 5; MYMY5                                                                      | Ensembl |
| ACT1            | ACTB                    | H. sapiens         | 243310                      | BARAITSER-WINTER SYNDROME 1; BRWS1                                                             | Ensembl |
| ACT1            | ACTBL2                  | H. sapiens         |                             |                                                                                                | Ensembl |
| ACT1            | ACTC1                   | H. sapiens         | 613424                      | CARDIOMYOPATHY, DILATED, 1R; CMD1R LEFT VENTRICULAR NONCOMPACTION 4, INCLUDED; LVNC4, INCLUDED | Ensembl |
| ACT1            | ACTG2                   | H. sapiens         | 155310                      | VISCERAL MYOPATHY; VSCM                                                                        | Ensembl |
| ACT1            | ACTR1A                  | H. sapiens         |                             |                                                                                                | Ensembl |
| ACT1            | ACTR1B                  | H. sapiens         |                             |                                                                                                | Ensembl |
| ACT1            | ACTRT1                  | H. sapiens         |                             |                                                                                                | Ensembl |
| ACT1            | ACTRT2                  | H. sapiens         |                             |                                                                                                | Ensembl |
| ACT1            | ACTRT3                  | H. sapiens         |                             |                                                                                                | Ensembl |
| ASF1            | ASF1A                   | H. sapiens         |                             |                                                                                                | Ensembl |
| ASF1            | ASF1B                   | H. sapiens         |                             |                                                                                                | Ensembl |
| BRE1            | RNF20                   | H. sapiens         |                             |                                                                                                | Ensembl |
| BRE1            | RNF40                   | H. sapiens         |                             |                                                                                                | Ensembl |
| CDC15           | MAP3K14                 | H. sapiens         |                             |                                                                                                | Ensembl |
| CDC15           | MAP3K15                 | H. sapiens         |                             |                                                                                                | Ensembl |
| CDC15           | MAP3K5                  | H. sapiens         |                             |                                                                                                | Ensembl |
| CDC15           | MAP3K6                  | H. sapiens         |                             |                                                                                                | Ensembl |
| CDC15           | MAP3K8                  | H. sapiens         | 211980                      | LUNG CANCER ALVEOLAR CELL CARCINOMA, INCLUDED                                                  | Ensembl |
| CDC5            | PLK1                    | H. sapiens         |                             |                                                                                                | Ensembl |
| CDC5            | PLK2                    | H. sapiens         |                             |                                                                                                | Ensembl |
| CDC5            | PLK3                    | H. sapiens         |                             |                                                                                                | Ensembl |
| CDC5            | PLK4                    | H. sapiens         | 616171                      | MICROCEPHALY AND CHORIORETINOPATHY, AUTOSOMAL RECESSIVE, 2; MCCR2                              | Ensembl |
| CDC73           | CDC73                   | H. sapiens         | 608266                      | PARATHYROID CARCINOMA                                                                          | Ensembl |
| CDC73           | CDC73                   | H. sapiens         | 145001                      | HYPERPARATHYROIDISM 2; HRPT2                                                                   | Ensembl |

|       |       |            |        |                                                                                                                                             |         |
|-------|-------|------------|--------|---------------------------------------------------------------------------------------------------------------------------------------------|---------|
| CDC73 | CDC73 | H. sapiens | 145000 | HYPERPARATHYROIDISM 1;<br>HRPT1                                                                                                             | Ensembl |
| CHL1  | BRIP1 | H. sapiens | 609054 | FANCONI ANEMIA,<br>COMPLEMENTATION GROUP<br>J; FANCI                                                                                        | Ensembl |
| CHL1  | BRIP1 | H. sapiens | 114480 | BREAST CANCER                                                                                                                               | Ensembl |
| CHL1  | DDX11 | H. sapiens | 613398 | WARSAW BREAKAGE<br>SYNDROME; WABS                                                                                                           | Ensembl |
| CHL1  | RTEL1 | H. sapiens | 616373 | PULMONARY FIBROSIS<br>AND/OR BONE MARROW<br>FAILURE,<br>TELOMERE-RELATED, 3;<br>PFBMFT3                                                     | Ensembl |
| CHL1  | RTEL1 | H. sapiens | 615190 | DYSKERATOSIS CONGENITA,<br>AUTOSOMAL RECESSIVE 5;<br>DKCB5 DYSKERATOSIS<br>CONGENITA, AUTOSOMAL<br>DOMINANT 4, INCLUDED;<br>DKCA4, INCLUDED | Ensembl |
| CLB2  | CCNA1 | H. sapiens |        |                                                                                                                                             | Ensembl |
| CLB2  | CCNA2 | H. sapiens |        |                                                                                                                                             | Ensembl |
| CLB2  | CCNB1 | H. sapiens |        |                                                                                                                                             | Ensembl |
| CLB2  | CCNB2 | H. sapiens |        |                                                                                                                                             | Ensembl |
| CLB2  | CCNB3 | H. sapiens |        |                                                                                                                                             | Ensembl |
| CLB2  | CCND1 | H. sapiens | 193300 | VON HIPPEL-LINDAU<br>SYNDROME; VHL VON<br>HIPPEL-LINDAU SYNDROME,<br>MODIFIERS OF, INCLUDED                                                 | Ensembl |
| CLB2  | CCND1 | H. sapiens | 114500 | COLORECTAL CANCER; CRC                                                                                                                      | Ensembl |
| CLB2  | CCND1 | H. sapiens | 254500 | MYELOMA, MULTIPLE<br>AMYLOIDOSIS, SYSTEMIC,<br>INCLUDED; AL, INCLUDED                                                                       | Ensembl |
| CLB2  | CCND2 | H. sapiens | 615938 | MEGALENCEPHALY-POLYMIC<br>ROGYRIA-POLYDACTYLY-HY<br>DROCEPHALUS SYNDROME 3;<br>MPPH3                                                        | Ensembl |
| CLB2  | CCND3 | H. sapiens |        |                                                                                                                                             | Ensembl |
| CLB2  | CCNE1 | H. sapiens |        |                                                                                                                                             | Ensembl |
| CLB2  | CCNE2 | H. sapiens |        |                                                                                                                                             | Ensembl |
| CLB2  | CCNO  | H. sapiens | 615872 | CILIARY DYSKINESIA,<br>PRIMARY, 29; CILD29                                                                                                  | Ensembl |
| CLB5  | CCNA1 | H. sapiens |        |                                                                                                                                             | Ensembl |
| CLB5  | CCNA2 | H. sapiens |        |                                                                                                                                             | Ensembl |

|        |        |            |        |                                                                                    |         |
|--------|--------|------------|--------|------------------------------------------------------------------------------------|---------|
| CLB5   | CCNB1  | H. sapiens |        |                                                                                    | Ensembl |
| CLB5   | CCNB2  | H. sapiens |        |                                                                                    | Ensembl |
| CLB5   | CCNB3  | H. sapiens |        |                                                                                    | Ensembl |
| CLB5   | CCND1  | H. sapiens | 193300 | VON HIPPEL-LINDAU SYNDROME; VHL VON HIPPEL-LINDAU SYNDROME, MODIFIERS OF, INCLUDED | Ensembl |
| CLB5   | CCND1  | H. sapiens | 114500 | COLORECTAL CANCER; CRC                                                             | Ensembl |
| CLB5   | CCND1  | H. sapiens | 254500 | MYELOMA, MULTIPLE                                                                  | Ensembl |
| CLB5   | CCND2  | H. sapiens | 615938 | AMYLOIDOSIS, SYSTEMIC, INCLUDED; AL, INCLUDED                                      | Ensembl |
| CLB5   | CCND3  | H. sapiens |        | MEGALENCEPHALY-POLYMIC                                                             | Ensembl |
| CLB5   | CCNE1  | H. sapiens |        | ROGYRIA-POLYDACTYLY-HY                                                             | Ensembl |
| CLB5   | CCNE2  | H. sapiens |        | DROCEPHALUS SYNDROME 3;                                                            | Ensembl |
| CLB5   | CCNO   | H. sapiens | 615872 | MPPH3                                                                              | Ensembl |
| CTF18  | CHTF18 | H. sapiens |        | CILIARY DYSKINESIA,                                                                | Ensembl |
| CTF4   | WDHD1  | H. sapiens |        | PRIMARY, 29; CILD29                                                                | Ensembl |
| GIM4   | PFDN2  | H. sapiens |        |                                                                                    | Ensembl |
| GWT1   | PIGW   | H. sapiens | 616025 | HYPERPHOSPHATASIA WITH                                                             | Ensembl |
| KAR3   | KIF25  | H. sapiens |        | MENTAL RETARDATION                                                                 | Ensembl |
| KAR3   | KIFC1  | H. sapiens |        | SYNDROME 5; HPMRS5                                                                 | Ensembl |
| KAR3   | KIFC3  | H. sapiens |        |                                                                                    | Ensembl |
| LEO1   | LEO1   | H. sapiens |        |                                                                                    | Ensembl |
| MCM3   | MCM3   | H. sapiens |        |                                                                                    | Ensembl |
| NDC80  | NDC80  | H. sapiens |        |                                                                                    | Ensembl |
| NIP100 | CLIP1  | H. sapiens |        |                                                                                    | Ensembl |
| NIP100 | CLIP2  | H. sapiens |        |                                                                                    | Ensembl |
| NIP100 | CLIP3  | H. sapiens |        |                                                                                    | Ensembl |
| PAC10  | VBP1   | H. sapiens |        |                                                                                    | Ensembl |
| PDS5   | PDS5A  | H. sapiens |        |                                                                                    | Ensembl |
| PDS5   | PDS5B  | H. sapiens |        |                                                                                    | Ensembl |
| POL1   | POLA1  | H. sapiens | 310465 | N SYNDROME; NSX                                                                    | Ensembl |
| PSF1   | GINS1  | H. sapiens |        |                                                                                    | Ensembl |
| RFA1   | RPA1   | H. sapiens |        |                                                                                    | Ensembl |
| RFC2   | RFC4   | H. sapiens |        |                                                                                    | Ensembl |
| RTF1   | RTF1   | H. sapiens |        |                                                                                    | Ensembl |
| SMC1   | SMC1A  | H. sapiens | 300590 | CORNELIA DE LANGE                                                                  | Ensembl |

|       |       |            |        | SYNDROME 2; CDLS2                                                   |         |
|-------|-------|------------|--------|---------------------------------------------------------------------|---------|
| SMC1  | SMC1B | H. sapiens |        |                                                                     | Ensembl |
| SPT14 | PIGA  | H. sapiens | 300868 | MULTIPLE CONGENITAL ANOMALIES-HYPOTONIA-SEIZURES SYNDROME 2; MCAHS2 | Ensembl |
| SPT14 | PIGA  | H. sapiens | 300818 | PAROXYSMAL NOCTURNAL HEMOGLOBINURIA 1; PNH1                         | Ensembl |
| STU2  | CKAP5 | H. sapiens |        |                                                                     | Ensembl |
| SUB1  | SUB1  | H. sapiens |        |                                                                     | Ensembl |
| SWD1  | RBBP5 | H. sapiens |        |                                                                     | Ensembl |
| XRN1  | XRN1  | H. sapiens |        |                                                                     | Ensembl |
| YKE2  | PFDN6 | H. sapiens |        |                                                                     | Ensembl |

**Supplementary Table S6: Mutants with manually confirmed increased synphilin-1 inclusions phenotype**

| Number | Mutant             | Normalized percentage of cells with SY1 inclusions (%) | Relative intensity | Intensity <i>t</i> -test (P value) |
|--------|--------------------|--------------------------------------------------------|--------------------|------------------------------------|
| 0      | wt                 | 50.00                                                  | 100.00             |                                    |
| 1      | <i>mob2-26</i>     | 73.01                                                  | 141.41             | 0.0453                             |
| 2      | <i>taf11-ts2</i>   | 72.52                                                  | 214.15             | 0.0165                             |
| 3      | <i>crm1-1</i>      | 68.70                                                  | 110.51             | 0.5755                             |
| 4      | <i>rtc1Δ</i>       | 68.22                                                  | 116.51             | 0.2105                             |
| 5      | <i>taf4-18</i>     | 67.69                                                  | 141.59             | 0.0179                             |
| 6      | <i>cdc24-3</i>     | 67.21                                                  | 113.76             | 0.6103                             |
| 7      | <i>taf12-W486</i>  | 65.61                                                  | 163.97             | 0.0214                             |
| 8      | <i>arx1Δ</i>       | 63.23                                                  | 124.13             | 0.5328                             |
| 9      | <i>ktr7Δ</i>       | 62.89                                                  | 128.45             | 0.0253                             |
| 10     | <i>rox1Δ</i>       | 61.78                                                  | 92.71              | 0.9362                             |
| 11     | <i>taf12-L464A</i> | 58.07                                                  | 266.95             | 0.0045                             |
| 12     | <i>taf12-9</i>     | 57.77                                                  | 154.13             | 0.0385                             |
| 13     | <i>taf12-L446A</i> | 57.71                                                  | 193.79             | 0.0061                             |
| 14     | <i>taf2-1</i>      | 57.28                                                  | 216.78             | 0.0040                             |
| 15     | <i>gdh1Δ</i>       | 54.82                                                  | 102.01             | 0.0978                             |

\* P ≤ 0.05 indicates significant signal intensity difference between wild-type and mutant

**Supplementary Table S7: Functional enrichment analysis of confirmed hits with increase of cells with synphilin-1 inclusion**

| Terms                                     | Gene(s) annotated to the term |
|-------------------------------------------|-------------------------------|
| DNA binding transcription factor activity | TAF2/TAF12/TAF11/TAF4/ROX1    |
| Transcription factor TFIID complex        | TAF2/TAF12/TAF11/TAF4         |

**Supplementary Table 8: Mutants showed significant decrease in both the percentage of cells with synphilin-1 inclusion and the fluorescence intensity**

| Number | Mutant            | Normalized percentage of cells with SY1 inclusions (%) | Relative intensity | Intensity <i>t</i> -test (P value) |
|--------|-------------------|--------------------------------------------------------|--------------------|------------------------------------|
| 0      | wt                | 50.00                                                  | 100.00             |                                    |
| 1      | <i>sem1Δ</i>      | 0.00                                                   | 61.94              | 0.0002                             |
| 2      | <i>dbp5-2</i>     | 0.00                                                   | 34.32              | 0.0030                             |
| 3      | <i>cdc10-5</i>    | 0.00                                                   | 42.79              | 0.0162                             |
| 4      | <i>cdc40-ts</i>   | 0.29                                                   | 47.33              | 0.0114                             |
| 5      | <i>bbp1-2</i>     | 0.42                                                   | 23.54              | 0.0097                             |
| 6      | <i>dbp5-1</i>     | 0.46                                                   | 25.95              | 0.0027                             |
| 7      | <i>hsl1Δ</i>      | 0.61                                                   | 65.14              | 0.0442                             |
| 8      | <i>yhc1-7</i>     | 0.98                                                   | 61.08              | 0.0135                             |
| 9      | <i>scd5-D338</i>  | 1.37                                                   | 59.15              | 0.0303                             |
| 10     | <i>cks1-38</i>    | 1.52                                                   | 39.71              | 0.0124                             |
| 11     | <i>nop2-10</i>    | 1.75                                                   | 51.24              | 0.0481                             |
| 12     | <i>spt3Δ</i>      | 1.80                                                   | 70.61              | 0.0299                             |
| 13     | <i>cdc28-td</i>   | 1.92                                                   | 38.01              | 0.0259                             |
| 14     | <i>spc29-20</i>   | 2.04                                                   | 59.88              | 0.0106                             |
| 15     | <i>nip7-1</i>     | 2.15                                                   | 53.83              | 0.0098                             |
| 16     | <i>srm1-G282S</i> | 2.21                                                   | 60.57              | 0.0328                             |
| 17     | <i>cdc123-4</i>   | 2.28                                                   | 35.70              | 0.0030                             |
| 18     | <i>pri2-1</i>     | 2.59                                                   | 76.96              | 0.0201                             |
| 19     | <i>prp18-1202</i> | 3.01                                                   | 74.75              | 0.0490                             |
| 20     | <i>rtg2Δ</i>      | 3.09                                                   | 53.06              | 0.0280                             |
| 21     | <i>med6-ts</i>    | 3.13                                                   | 41.44              | 0.0092                             |
| 22     | <i>orc3-70</i>    | 3.14                                                   | 67.46              | 0.0096                             |
| 23     | <i>cks1-35</i>    | 3.41                                                   | 25.26              | 0.0200                             |
| 24     | <i>scd5-PP1D2</i> | 3.47                                                   | 42.85              | 0.0133                             |
| 25     | <i>mtr3-ts</i>    | 3.53                                                   | 51.54              | 0.0110                             |
| 26     | <i>stu1-8</i>     | 3.56                                                   | 50.81              | 0.0171                             |
| 27     | <i>apc11-13</i>   | 3.91                                                   | 43.41              | 0.0072                             |
| 28     | <i>poll-2</i>     | 4.06                                                   | 67.81              | 0.0174                             |

|    |                   |       |       |        |
|----|-------------------|-------|-------|--------|
| 29 | <i>orc2-1</i>     | 4.06  | 48.64 | 0.0205 |
| 30 | <i>ded1-95</i>    | 4.20  | 52.68 | 0.0131 |
| 31 | <i>las17-13</i>   | 4.83  | 49.88 | 0.0460 |
| 32 | <i>act1-155</i>   | 4.95  | 52.21 | 0.0114 |
| 33 | <i>act1-132</i>   | 5.31  | 61.03 | 0.0074 |
| 34 | <i>dcc1Δ</i>      | 5.73  | 65.61 | 0.0094 |
| 35 | <i>sup35-td</i>   | 6.02  | 45.82 | 0.0076 |
| 36 | <i>bem2Δ</i>      | 6.05  | 50.21 | 0.0149 |
| 37 | <i>spt6-14</i>    | 6.07  | 49.81 | 0.0281 |
| 38 | <i>slu7-ts2</i>   | 6.09  | 65.87 | 0.0225 |
| 39 | <i>cdc37-ts</i>   | 6.19  | 45.76 | 0.0036 |
| 40 | <i>rmp1-ts</i>    | 6.75  | 54.20 | 0.0337 |
| 41 | <i>cdc48-3</i>    | 6.97  | 58.69 | 0.0225 |
| 42 | <i>rtg1Δ</i>      | 7.69  | 40.06 | 0.0359 |
| 43 | <i>rna15-58</i>   | 7.77  | 71.03 | 0.0184 |
| 44 | <i>cft2-1</i>     | 8.01  | 70.40 | 0.0286 |
| 45 | <i>stu2-11</i>    | 8.26  | 73.30 | 0.0408 |
| 46 | <i>lcb1-10</i>    | 8.35  | 58.60 | 0.0149 |
| 47 | <i>lst8-6</i>     | 8.85  | 68.69 | 0.0329 |
| 48 | <i>elm1Δ</i>      | 8.98  | 46.75 | 0.0176 |
| 49 | <i>stu2-12</i>    | 8.99  | 55.24 | 0.0116 |
| 50 | <i>cik1Δ</i>      | 9.02  | 57.19 | 0.0047 |
| 51 | <i>mnn10Δ</i>     | 9.38  | 46.61 | 0.0081 |
| 52 | <i>mps3-7</i>     | 9.40  | 43.24 | 0.0333 |
| 53 | <i>arp1Δ</i>      | 9.44  | 81.88 | 0.0034 |
| 54 | <i>stp1Δ</i>      | 9.83  | 80.72 | 0.0305 |
| 55 | <i>orc2-4</i>     | 9.93  | 74.93 | 0.0468 |
| 56 | <i>mud2Δ</i>      | 10.14 | 48.14 | 0.0037 |
| 57 | <i>sub2-1</i>     | 10.45 | 35.45 | 0.0088 |
| 58 | <i>ssd1Δ</i>      | 10.86 | 90.76 | 0.0497 |
| 59 | <i>cdc28-4</i>    | 10.99 | 62.28 | 0.0200 |
| 60 | <i>afg2-18</i>    | 11.16 | 57.09 | 0.0118 |
| 61 | <i>spt5-194</i>   | 11.17 | 57.34 | 0.0382 |
| 62 | <i>swi4Δ</i>      | 11.31 | 92.23 | 0.0495 |
| 63 | <i>nup192-15</i>  | 11.32 | 65.10 | 0.0331 |
| 64 | <i>cdc8-2</i>     | 12.30 | 88.38 | 0.0366 |
| 65 | <i>cdc28-13</i>   | 12.30 | 56.84 | 0.0461 |
| 66 | <i>xrs2Δ</i>      | 12.32 | 86.78 | 0.0159 |
| 67 | <i>med8-51</i>    | 12.73 | 59.44 | 0.0191 |
| 68 | <i>pfy1-4</i>     | 12.79 | 46.65 | 0.0294 |
| 69 | <i>mre11Δ</i>     | 14.13 | 66.29 | 0.0471 |
| 70 | <i>bim1Δ</i>      | 14.27 | 49.17 | 0.0270 |
| 71 | <i>cdc33-E72G</i> | 14.33 | 57.95 | 0.0094 |
| 72 | <i>dam1-19</i>    | 14.59 | 46.89 | 0.0021 |

|    |                 |       |       |        |
|----|-----------------|-------|-------|--------|
| 73 | <i>pri1-M4</i>  | 15.66 | 79.81 | 0.0214 |
| 74 | <i>sse1Δ</i>    | 15.96 | 53.16 | 0.0385 |
| 75 | <i>gas1Δ</i>    | 17.47 | 77.04 | 0.0209 |
| 76 | <i>mks1Δ</i>    | 20.12 | 46.09 | 0.0164 |
| 77 | <i>cdc4-3</i>   | 20.20 | 67.39 | 0.0428 |
| 78 | <i>rpo41Δ</i>   | 20.34 | 72.04 | 0.0171 |
| 79 | <i>tfa2-45</i>  | 22.67 | 70.31 | 0.0223 |
| 80 | <i>pol12-ts</i> | 24.92 | 62.32 | 0.0186 |
| 81 | <i>gcr2Δ</i>    | 26.82 | 41.63 | 0.0299 |
| 82 | <i>enp1-1</i>   | 30.34 | 67.76 | 0.0337 |
| 83 | <i>ume6Δ</i>    | 32.50 | 66.11 | 0.0210 |
| 84 | <i>wbp1-1</i>   | 33.11 | 72.31 | 0.0313 |
| 85 | <i>rio2-1</i>   | 35.75 | 65.69 | 0.0268 |
| 86 | <i>pda1Δ</i>    | 36.10 | 79.11 | 0.0205 |

\*  $P \leq 0.05$  indicates significant signal intensity difference between wild-type and mutant

### SUPPLEMENTARY FIGURE

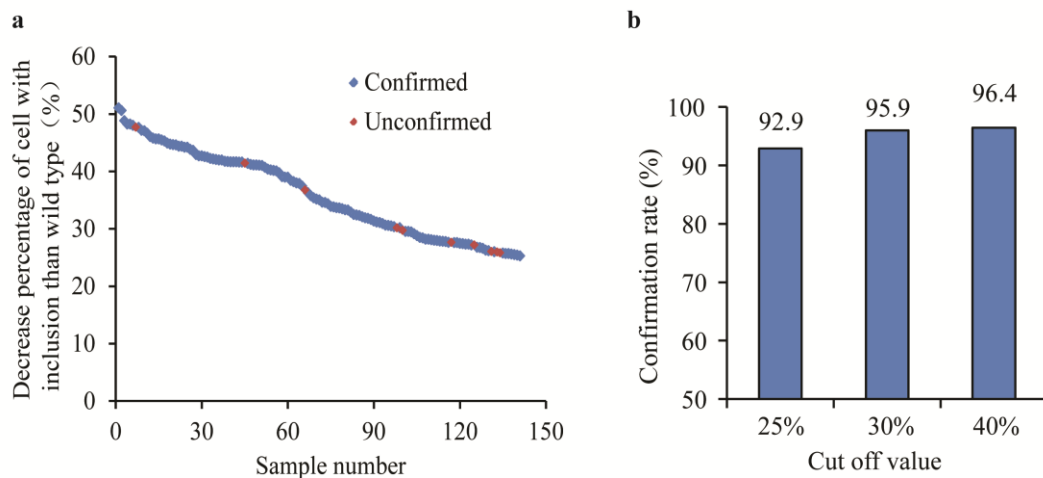

**Supplementary Figure S1. Manual confirmation status of hits from HCI screening.** a) The distribution of the confirmation status of decreased synphilin-1 inclusion formation hits, sorted based on their difference (from high to low) from the WT strain. Blue dots represented confirmed hits, and red ones represented unconfirmed mutants. b) Confirmation rate of hits with decrease synphilin-1 inclusion formation rate. Bars showed the confirmation rate by manual confirmation with different cut off values.
